# Supplementary material
Source: publisher figshare collection journal article supplement (https://gsajournals.figshare.com/ndownloader/files/14645213)
Supplement: Supplementary file 1 [file 14645213]

## Sheet: Sheet1
	Table S1. 112 genes included in the yeast spliceosome custom targeted sequencing panel
Systematic	Gene	coding (bp)	Alias(es)	Description
YBL074C	AAR2	1068		U5 snRNP assembly protein
YER172C	BRR2	6492	PRP44, SNU246, SLT22, RSS1	RNA-dependent ATPase, RNA helicase (DEIH box)
YGL174W	BUD13	801	CWC26	RES complex
YFL023W	BUD27	2391	URI1	identified by Larson, Fair, and Pleiss 2016
YCR063W	BUD31	474	CWC14	NTC-related protein
YPL178W	CBC2	627	CBP20, MUD13, SAE1	Cap-binding complex protein
YDR364C	CDC40	1368	PRP17, SLT15, SLU4	Second step splicing factor
YMR213W	CEF1	1773	NTC85	Nineteen complex protein
YLR117C	CLF1	2064	NTC77, SYF3	Nineteen complex protein
YMR240C	CUS1	1311		U2 snRNP protein
YNL286W	CUS2	858		U2 snRNP protein
YDR163W	CWC15	528		NTC-related protein
YDL209C	CWC2	1020	NTC40	NTC-related protein
YDR482C	CWC21	408		splicing factor
YGR278W	CWC22	1734		splicing factor
YGL128C	CWC23	852		splicing factor
YLR323C	CWC24	780		splicing factor
YNL245C	CWC25	540		C complex protein
YPL064C	CWC27	906		splicing factor
YKL149C	DBR1	1218	PRP26	RNA lariat debranching enzyme
YPR082C	DIB1	432	SNU16	tri-snRNP protein
YOR204W	DED1	1815	SPP81	DEAD-box RNA helicase
YGR093W	DRN1	1524		Cwf19 homolog, related to Dbr1
YBR065C	ECM2	1095	SLT11	NTC-related protein
YBR102C	EXO84	2262	USA3	U1 snRNP-associated protein
YMR288W	HSH155	2916		U2 snRNP protein
YOR319W	HSH49	642		U2 snRNP protein
YIR005W	IST3	447	SNU17	RES complex
YJR050W	ISY1	708	NTC30, UTR3	Nineteen complex protein
YPL213W	LEA1	717		U2 snRNP protein, U2A' homolog
YDL051W	LHP1	828	LAH1, YLA1	La Homologous protein, U6 biosynthesis
YHR156C	LIN1	1023	SNU40	U5 snRNP protein
YJL124C	LSM1	519	SPB8	Lsm protein
YHR121W	LSM12	564		Unknown function
YBL026W	LSM2	416	SNP3, SMX5	U6 snRNP protein
YLR438C-A	LSM3	270	USS2, SMX4	U6 snRNP protein
YER112W	LSM4	564	USS1, SDB23	U6 snRNP protein
YER146W	LSM5	282		U6 snRNP protein
YDR378C	LSM6	261		U6 snRNP protein
YNL147W	LSM7	444		U6 snRNP protein
YJR022W	LSM8	330		U6 snRNP protein
YDL087C	LUC7	786	EPE1, EXM2	U1 snRNP protein
YIR009W	MSL1	336	YIB9	U2 snRNP protein, U2B" homolog
YLR116W	MSL5	1431	BBP	Branchpoint binding protein
YBR119W	MUD1	986	U1A	U1 snRNP protein
YKL074C	MUD2	1584		U2AF65 homolog
YHR086W	NAM8	1572	MRE2, MUD15	U1 snRNP protein
YBR188C	NTC20	423		Nineteen complex protein
YKR022C	NTR2	969		NTR complex protein
YLR016C	PML1	615		RES complex
YDL043C	PRP11	801	RNA11	Subunit of the SF3a splicing factor complex
YKR086W	PRP16	3216	PRP23, RNA16	DEAH-box RNA helicase involved in second catalytic step of splicing
YGR006W	PRP18	756		C* complex protein
YLL036C	PRP19	1512	PSO4	Nineteen complex protein
YNR011C	PRP2	2631	RNA2	RNA-dependent DExD/H-box ATPase
YJL203W	PRP21	843	SPP91	Subunit of the SF3a splicing factor complex
YER013W	PRP22	3438		RNA helicase in the DEAD-box family, second step splicing factor
YMR268C	PRP24	1335		U6 snRNP protein
YDR243C	PRP28	1767		DEAH-box RNA-dependent ATPase/ATP-dependent RNA helicase
YDR473C	PRP3	1410	RNA3	U4/U6 di-snRNP protein
YGR091W	PRP31	1485		U4 snRNP protein
YGR075C	PRP38	729		tri-snRNP protein
YML046W	PRP39	1890		U1 snRNP protein
YPR178W	PRP4	1398	RNA4	U4/U6 di-snRNP protein
YKL012W	PRP40	1752		U1 snRNP protein
YDR235W	PRP42	1635	SNU65, MUD16	U1 snRNP protein
YGL120C	PRP43	2304	JA1	RNA helicase in the DEAH-box family
YAL032C	PRP45	1140	FUN20	NTC-related protein
YPL151C	PRP46	1356	NTC50	NTC-related protein
YBR237W	PRP5	2550	RNA5	RNA helicase in the DEAD-box family
YBR055C	PRP6	2700	TSM7269, RNA6	tri-snRNP protein
YHR165C	PRP8	7242	USA2, SLT21, RNA8, DNA39, DBF3	U5 snRNP protein
YDL030W	PRP9	1593		Subunit of the SF3a splicing factor complex
YPR094W	RDS3	324		SF3b protein
YML049C	RSE1	4086		U2 snRNP protein
YFR005C	SAD1	1347		U4/U6 di-snRNP assembly protein
YLR430W	SEN1	6696	CIK3, NRD2	possible spliceosome-associated protein, aquarius homolog?
YDR088C	SLU7	1149	SLT17	C* complex protein
YER029C	SMB1	591	SmB	Sm protein
YGR074W	SMD1	441	SmD1, SPP92	Sm protein
YLR275W	SMD2	423	SmD2	Sm protein
YLR147C	SMD3	306	SmD3, SLT16	Sm protein
YOR159C	SME1	285	SmE	Sm protein
YFL017W-A	SMX2	234	SmG, SNP2	Sm protein
YPR182W	SMX3	261	SmF	Sm protein
YIL061C	SNP1	903	U1-70K	U1 snRNP protein
YPR101W	SNT309	864	NTC25	Nineteen complex protein
YKL173W	SNU114	3027	GIN10	U5 snRNP protein
YEL026W	SNU13	381		U4 snRNP protein
YDL098C	SNU23	585		tri-snRNP protein
YDR240C	SNU56	1479	MUD10	U1 snRNP protein
YOR308C	SNU66	1764		tri-snRNP protein
YGR013W	SNU71	1863		U1 snRNP protein
YOR148C	SPP2	558		Stimulates Prp2
YBR152W	SPP381	876		tri-snRNP protein
YLR424W	SPP382	2127	CCF8, NTR1	NTR complex protein
YDR464W	SPP41	4308		suppressor of PRP4 mutation
YNL222W	SSU72	621		Ser5 CTD phosphatase, see Larson, Fair, and Pleiss 2016
YMR125W	STO1	2908	CBC1, CBP80, GCR3, SUT1	Cap-binding complex protein
YDL084W	SUB2	1341		RNA helicase in the DEAD-box family
YDR416W	SYF1	2580	NTC90	Nineteen complex protein
YGR129W	SYF2	648	NTC31	Nineteen complex protein
SNR19	U1	568		spliceosomal RNA
LSR1	U2	1175	SNR20	spliceosomal RNA
SNR14	U4	160		spliceosomal RNA
SNR7-L	U5	214	SNR7S	spliceosomal RNA
SNR6	U6	112		spliceosomal RNA
YPR152C	URN1	1398		TCERG1 homolog
YLR132C	USB1	873		U6 RNA 3' processing
YLR298C	YHC1	696	U1C	U1 snRNP protein
YKL095W	YJU2	837		C complex protein
YNL138W-A	YSF3	1581	RCP10	SF3b protein
	total	150047
sum
	Note: HUB1 was inadvertantly omitted.
